# Supplementary material for: Engineering anomalous elastic properties of coordination polymers and their amorphization by employing flexible linkers
Source: Royal Society of Chemistry journal article supplement (doi:10.1039/d3tc01732j), 2023-01-01
Supplement: d3tc01732j1.pdf [file d3tc01732j1.pdf]

## Supporting Information

# Engineering anomalous elastic properties of coordination polymers and their amorphization by employing flexible linkers

Aleksandra Pótrołniczak, Szymon Sobczak and Andrzej Katrusiak\*

\*Department of Materials Chemistry, Faculty of Chemistry, Adam Mickiewicz University, Uniwersytetu

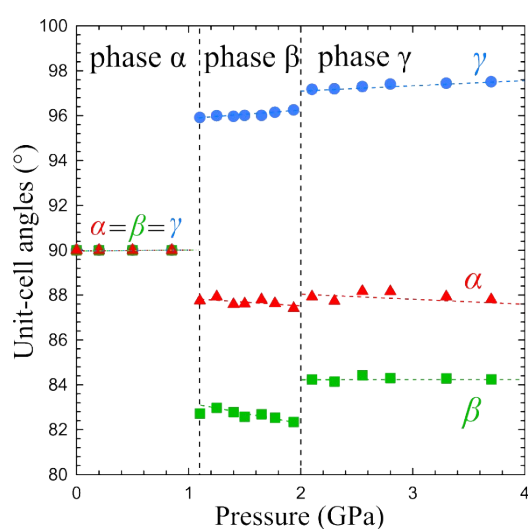

Figure S1. The unit-cell angles of  $\text{Cd}(\text{HDA})_2(\text{NO}_3)_2$  as a function of pressure. Lines are for guiding the eye only. ESDs are smaller than plotted symbols.

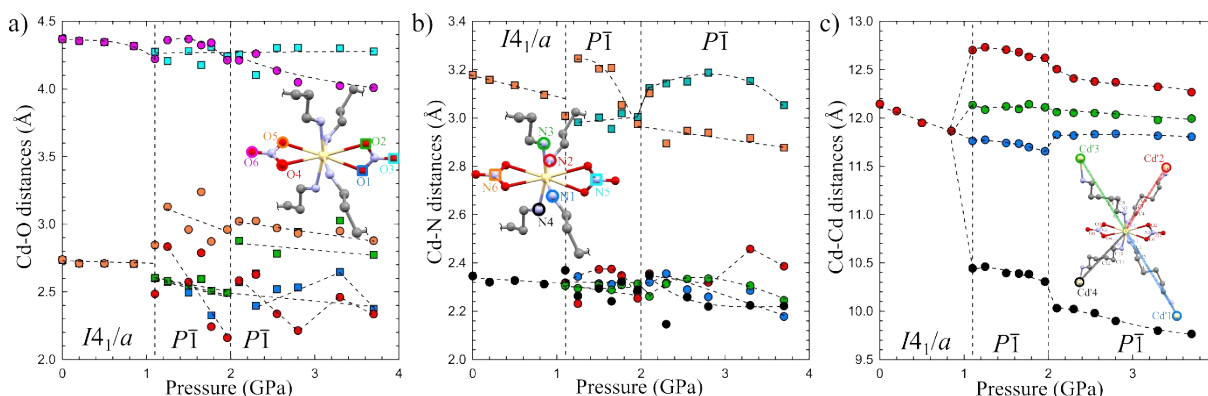

Figure S2.  $\text{Cd}(\text{HDA})_2(\text{NO}_3)_2$  coordination sphere presented as Cd-O (a), Cd-N (b) and (c) pressure-induced reduction of the Cd-Cd' distances in the function of pressure. Lines are for guiding the eye only. ESDs are smaller than plotted symbols.

Poznańskiego 8, 61-614 Poznan, Poland, katran@amu.edu.pl.

## Supporting Information

Figure S3. The molecular volume (a) unit-cell parameters (b) and unit-cell angles (c) of  $\text{Cd}(\text{HDA})_2(\text{NO}_3)_2$  presented as a function of temperature. Lines are for guiding the eye only. ESDs are smaller than plotted symbols.

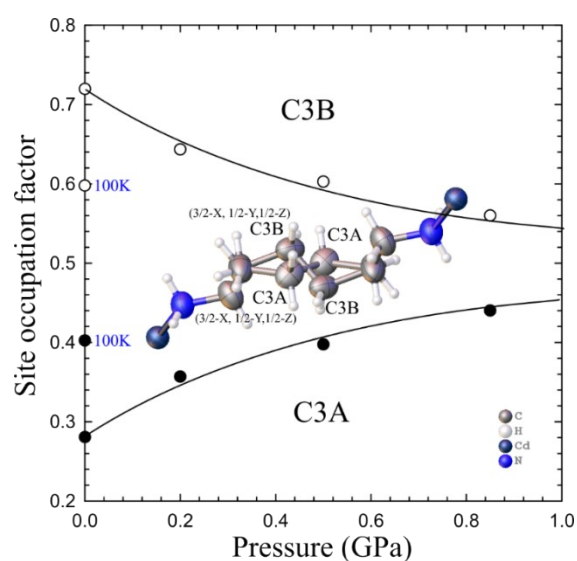

Figure S4. Site occupation factor of the disordered carbon atoms in HDA linker in  $\alpha$ -phase. Full symbols represent the C3A atom, and open symbols C3B.

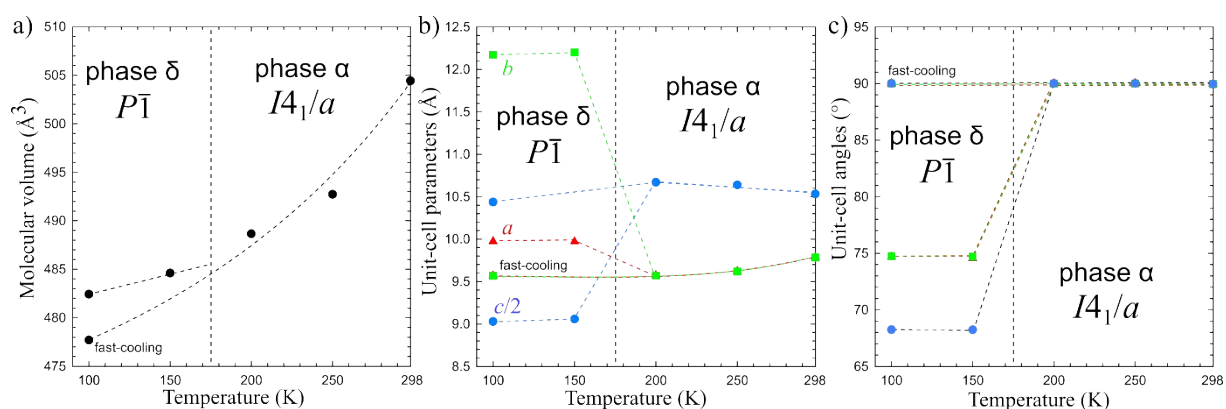

## Supporting Information

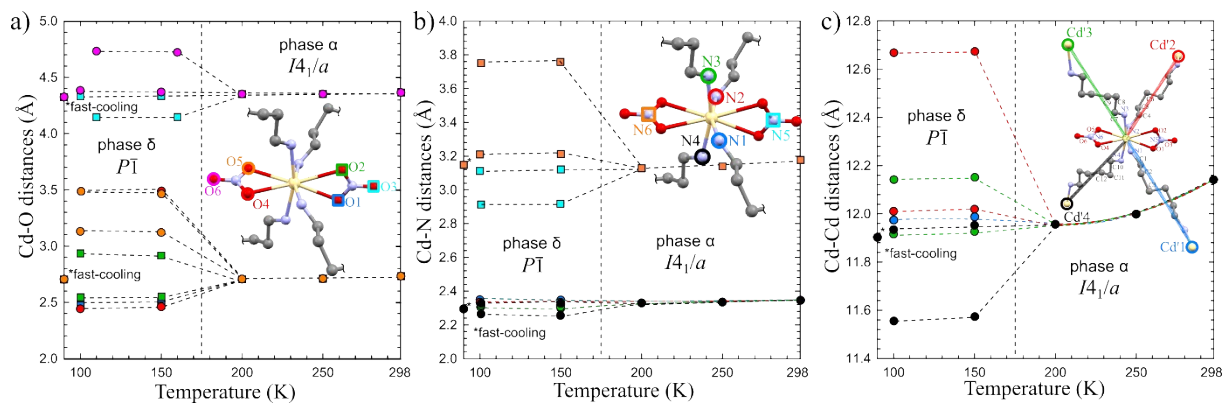

Figure S5. Cd(HDA)<sub>2</sub>(NO<sub>3</sub>)<sub>2</sub> coordination sphere presented as Cd-O (a), Cd-N (b) and (c) pressure-induced reduction of the Cd-Cd' distances in the function of temperature. Lines are for guiding the eye only. ESDs are smaller than plotted symbols.

## Supporting Information

Figure S6.  $\text{Cd}_2(\text{HDA})_3(\text{NO}_3)_4$  coordination sphere presented as Cd-O (a), Cd-N (b) distances and (c) pressure-induced reduction of the Cd-Cd' in the function of pressure. Lines are for guiding the eye only. ESDs are smaller than plotted symbols, despite the model for the measurement collected at 4.30 GPa which due to a partial amorphization and additional constrains require for refining the structure is of lower quality.

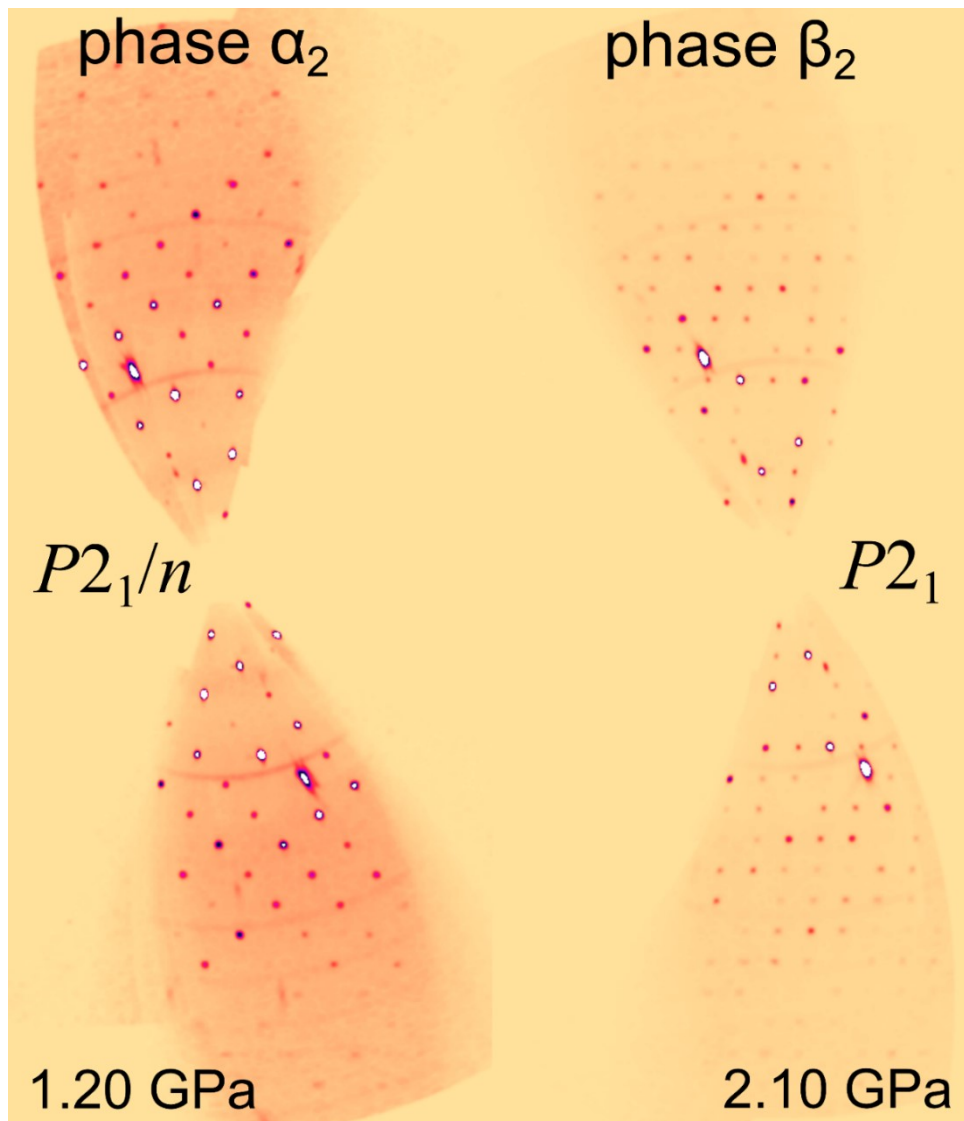

Figure S7. The h0l layers presenting the disappearance of the n glide plane (connected with appearance  $h + l = n$  reflections) above a pressure above 1.2 GPa for  $\text{Cd}_2(\text{HDA})_3(\text{NO}_3)_4$ .

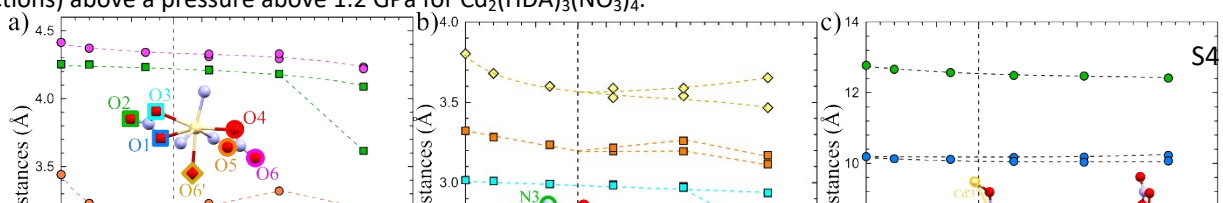

## Supporting Information

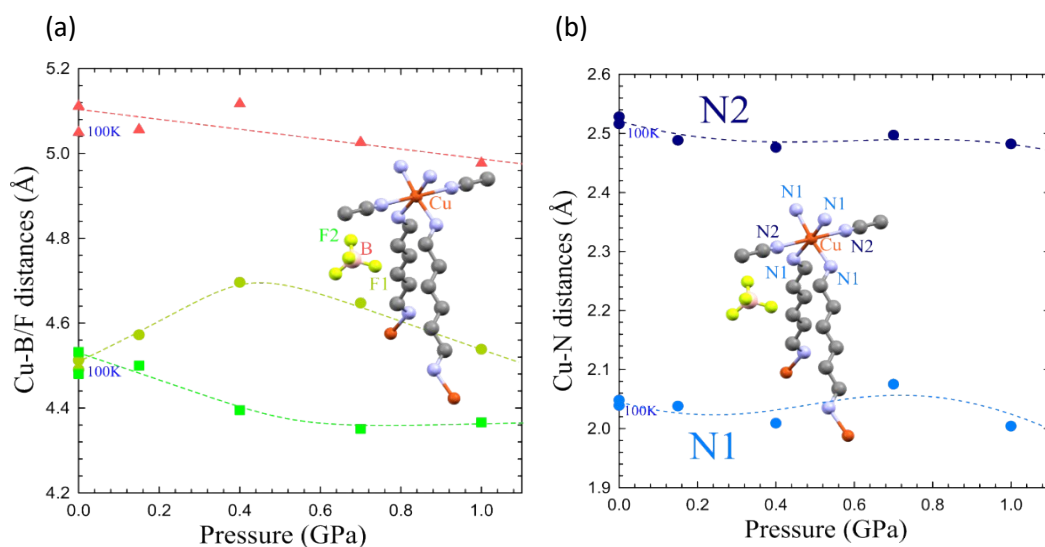

Figure S8. Changes in the Cu(HDA)<sub>2</sub>(MeCN)<sub>2</sub>·2BF<sub>4</sub> coordination sphere presented as a distances (a) Cu-B and Cu-F and (b) Cu-N distances pressure-induced reduction of the Cu-Cu' distance. Lines are for guiding the eye. ESDs are smaller than plotted symbols

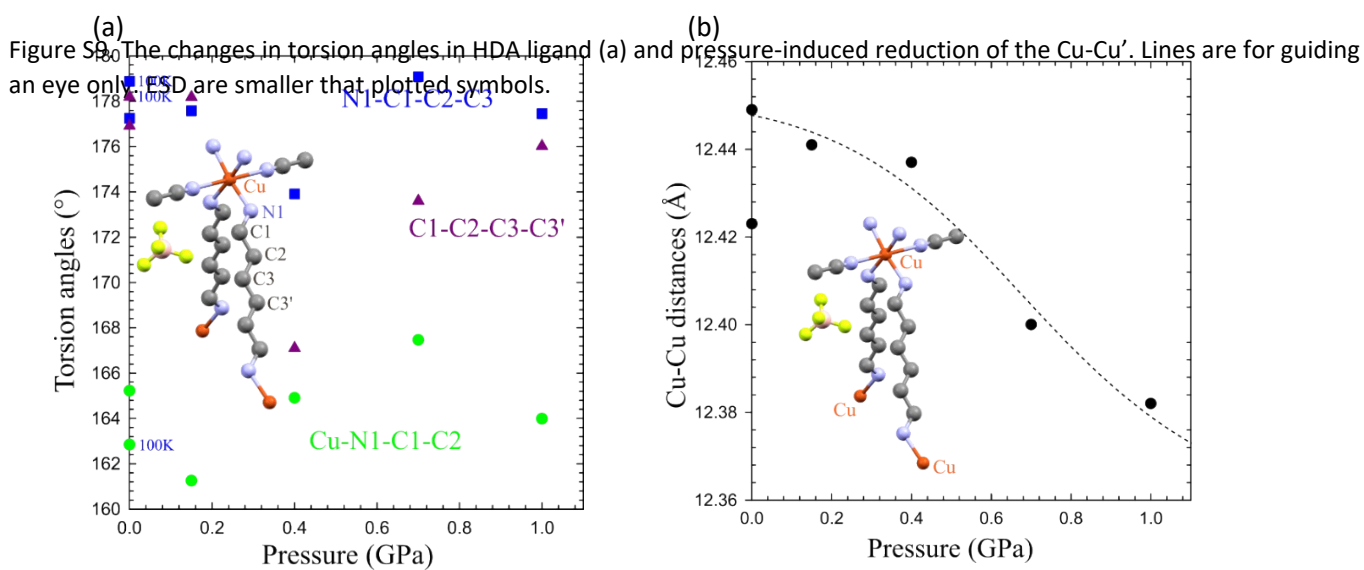

Figure S9. The changes in torsion angles in HDA ligand (a) and pressure-induced reduction of the Cu-Cu'. Lines are for guiding an eye only. ESD are smaller than plotted symbols.

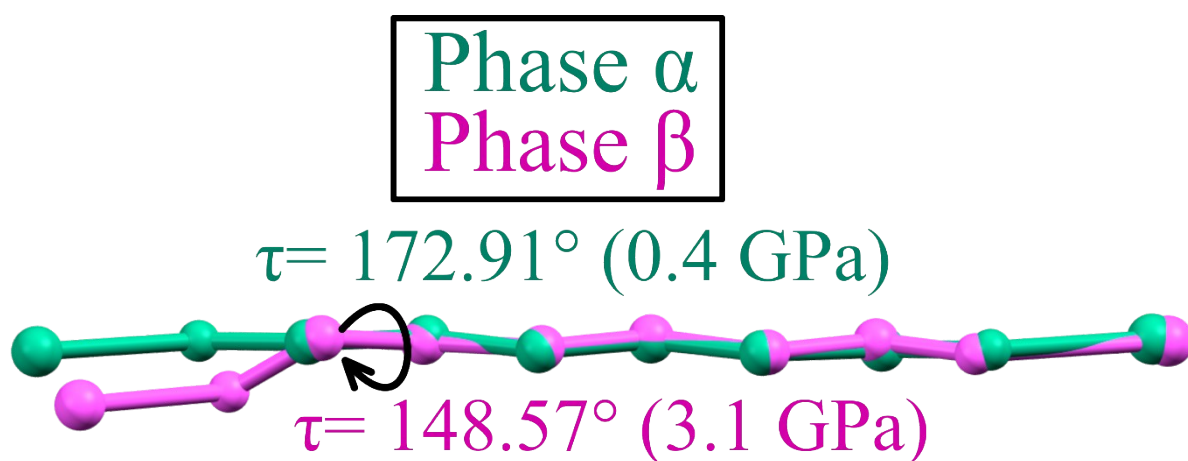

Figure S10. Conformational changes in the HDA linker in  $\text{Cd}_2(\text{HDA})_3(\text{NO}_3)_4$ ,  $C_i$ -symmetric HDA from phase  $\alpha$  (green) superimposed on HDA of phase  $\beta$  (pink). The torsion angles N3-C7-C8-C9 ( $\tau$ ) indicates the conformational change between phase  $\alpha$  at 0.4 GPa (green) and phase  $\beta$  at 3.1 GPa (pink).

Figure S11. The adjacent binuclear centers bonded by a  $\pi$ -hole interaction  $\text{NO}_3 \cdots \text{NO}_3$  between bidentate nitrate groups in  $\text{Cd}_2(\text{HDA})_3(\text{NO}_3)_4$ .

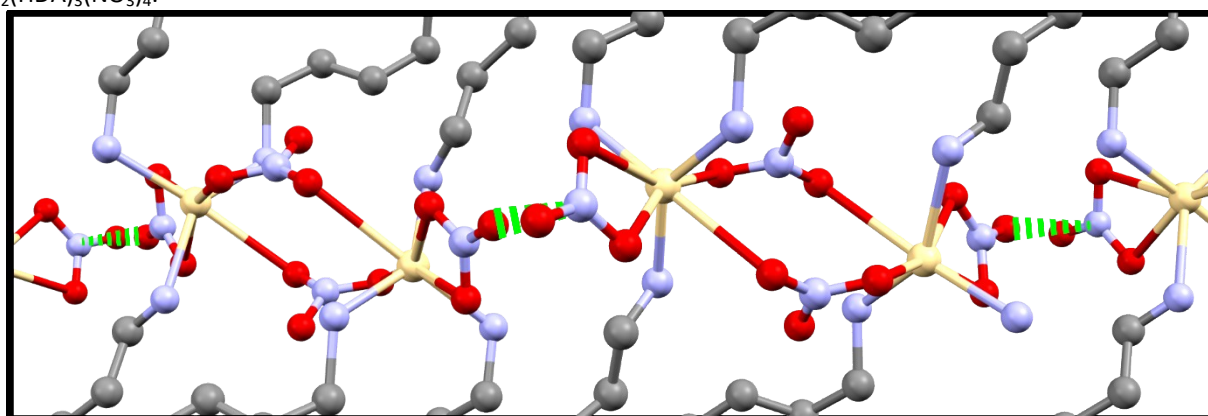

## Supporting Information

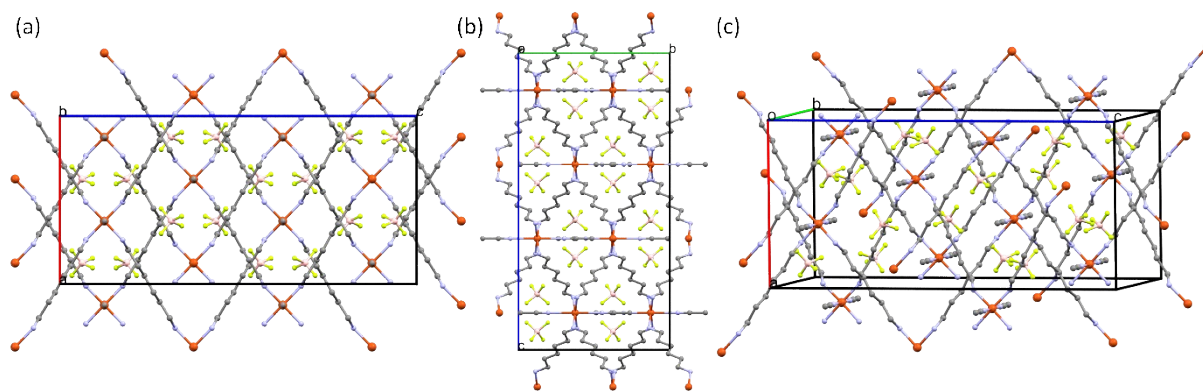

Figure S12.  $\text{Cu}(\text{HDA})_2(\text{MeCN})_2 \cdot 2\text{BF}_4$  structures projected along direction (a)  $[010]$ , (b)  $[100]$ , (c) view on the diamond-like framework.

(a)

(c)

(d)

## Supporting Information

(a)

(b)

(c)

(d)

Figure S13.  $\text{Cd}(\text{HDA})_2(\text{NO}_3)_2$  structures projected along direction (a) [100], (b) [010], (c) [001], [d] stereographic projection of the framework.

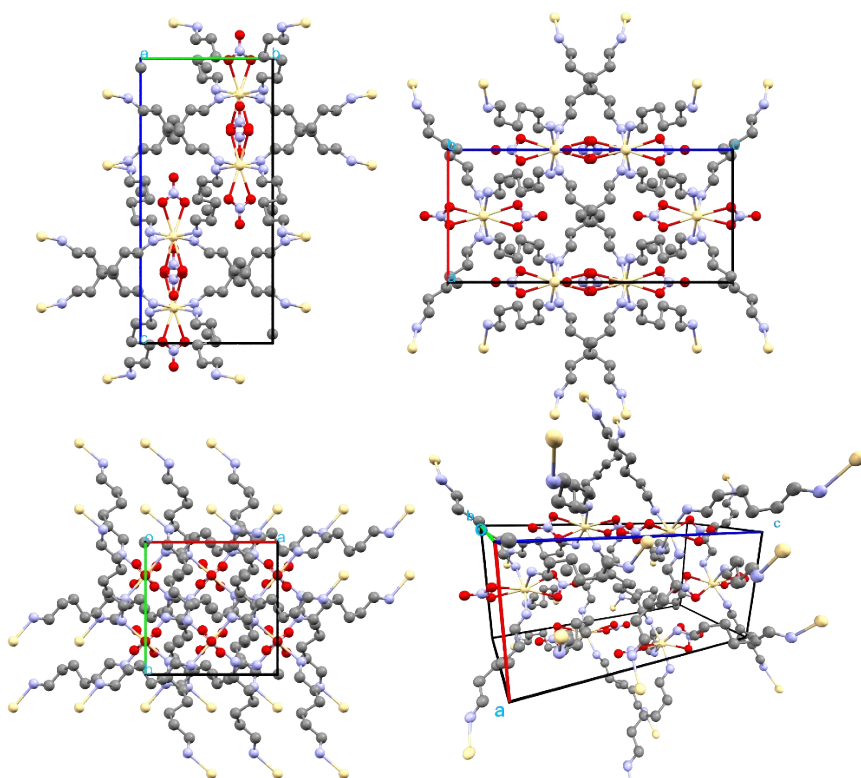



## Supporting Information

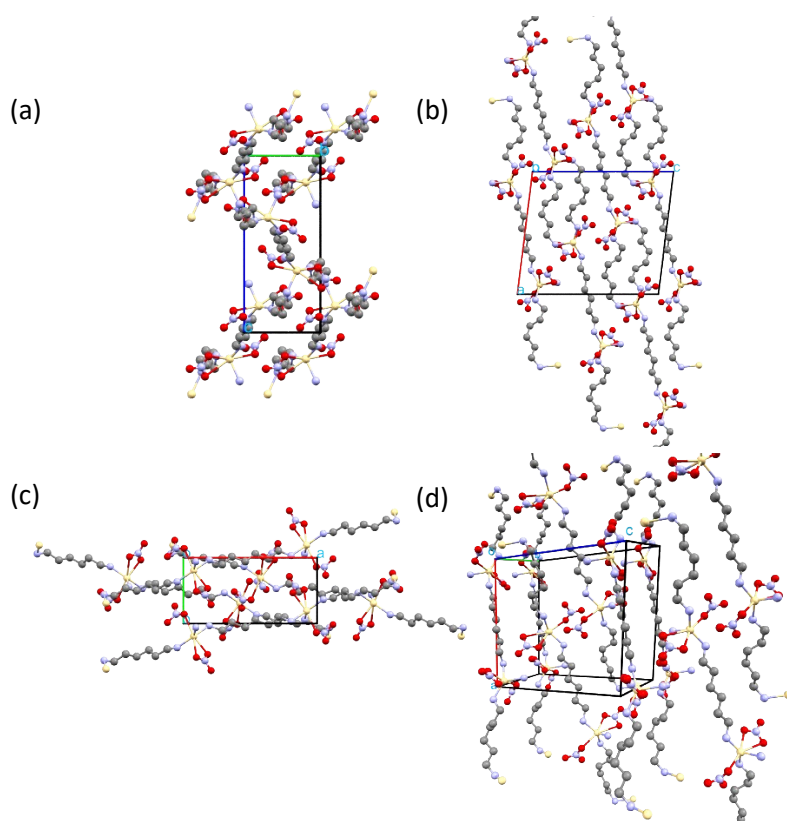

Figure S14.  $\text{Cd}_2(\text{HDA})_3(\text{NO}_3)_4$  structures projected along direction (a)  $[100]$ , (b)  $[010]$ , (c)  $[001]$ , [d] stereographic projection of the framework.

## Supporting Information

Figure S15. The crystal structure of (a)  $\text{Cd}(\text{HDA})_2(\text{NO}_3)_2$ , (b)  $\text{Cd}_2(\text{HDA})_3(\text{NO}_3)_4$ , and (c)  $\text{Cu}(\text{HDA})_2(\text{MeCN})_2 \cdot 2\text{BF}_4$  with the void spaces calculated by program Mercury<sup>1</sup> as contact surface with probe radius 0.8 Å and grid step 0.1 Å. There are no voids larger than 0.8 Å in radius, capable of absorbing guest molecules.

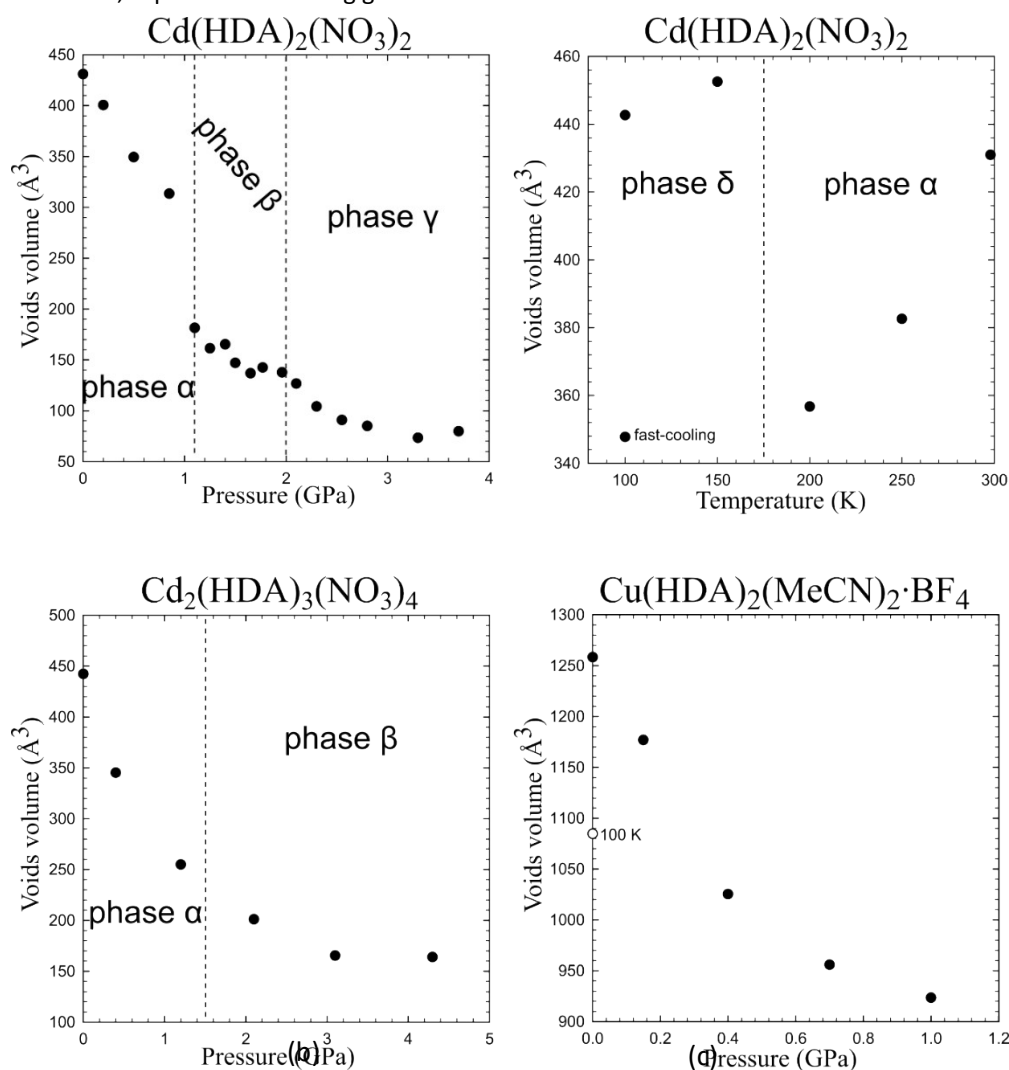

Figure S16. Change in the volume of the free voids calculated by Mercury<sup>1</sup> as contact surface with probe radius 0.3 Å and grid step 0.1 Å for (a)  $\text{Cd}(\text{HDA})_2(\text{NO}_3)_2$  (top left) phases  $\alpha$ ,  $\beta$ ,  $\gamma$  and (b) phase  $\delta$ ; (c)  $\text{Cd}_2(\text{HDA})_3(\text{NO}_3)_4$  phases  $\alpha$  and  $\beta$ ; (d)  $\text{Cu}(\text{HDA})_2(\text{MeCN})_2$  (bottom right).

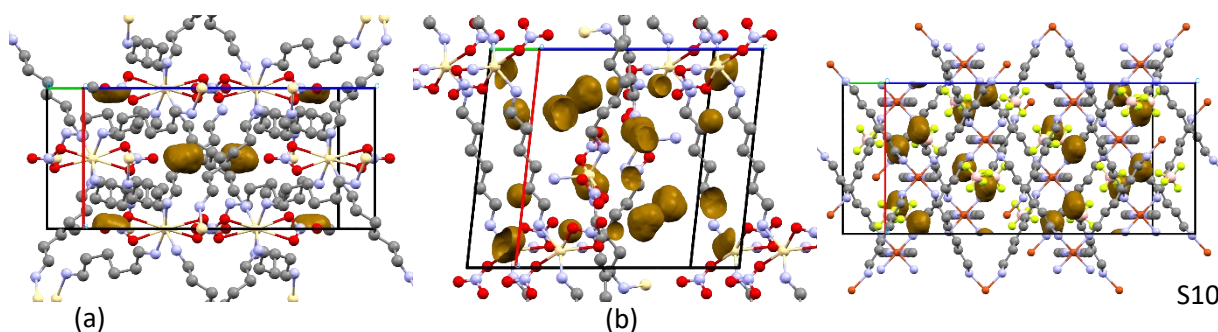

## Supporting Information

(a) (b) (c)

Figure S17.  $\text{Cd}(\text{HDA})_2(\text{NO}_3)_2$  crystal at (a) 0.7 GPa, (b) 3.6 GPa in DAC as well as (c) the recovered single-crystal mounted on a nylon loop for the X-ray diffraction experiment at room-conditions. The unit-cell dimensions of the crystal before and after the compression are compared below:

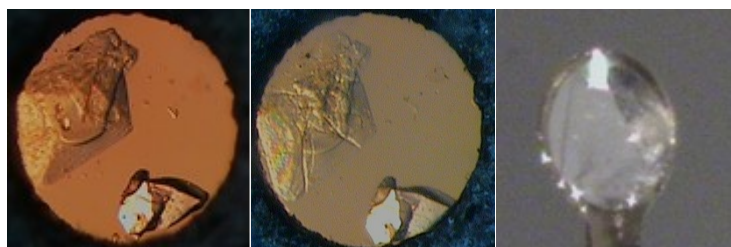

| $\text{Cd}(\text{HDA})_2(\text{NO}_3)_2$ | $a$ (Å)   | $b$ (Å)   | $c$ (Å)   | $V$ (Å <sup>3</sup> ) |
|------------------------------------------|-----------|-----------|-----------|-----------------------|
| as-synthesized                           | 9.7855(7) | 9.7855(7) | 21.071(3) | 2017.7(4)             |
| post-compressed                          | 9.7589(4) | 9.7589(4) | 21.026(5) | 2002.4 (8)            |

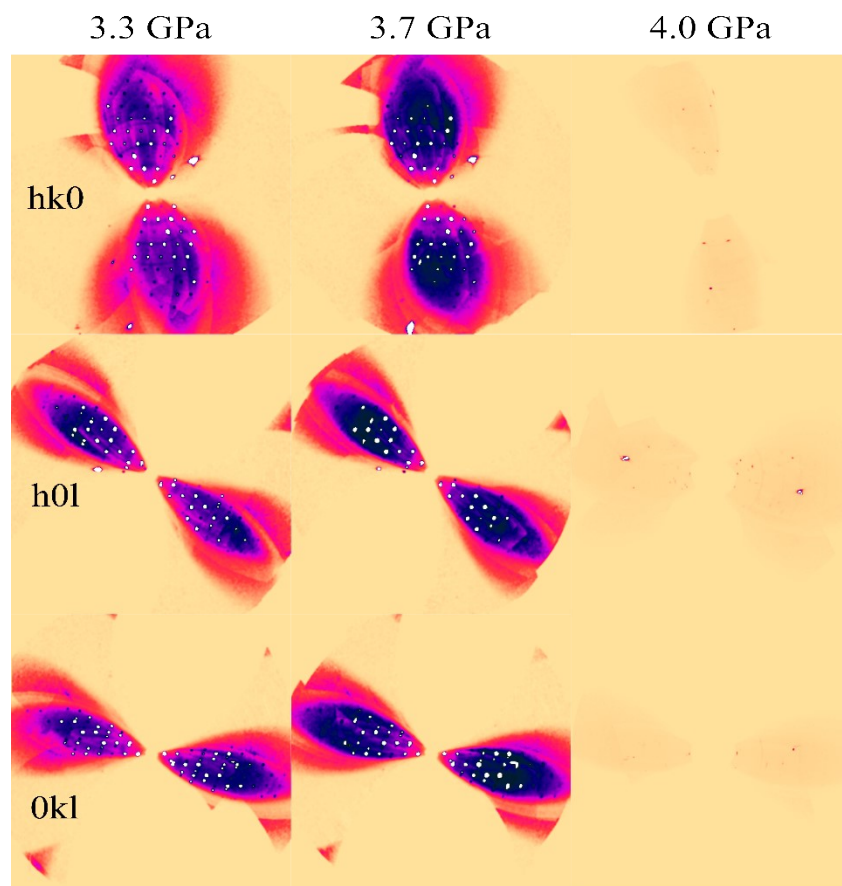

Figure S18. Reconstruction of reciprocal layers for the  $\text{Cd}(\text{HDA})_2(\text{NO}_3)_2$  crystal, showing decrease in the reflection intensities.

**Supporting Information**

## Supporting Information

Figure S19. Reconstruction of reciprocal layers for the  $\text{Cd}_2(\text{HDA})_3(\text{NO}_3)_4$  crystal, showing decrease in the reflection intensities.

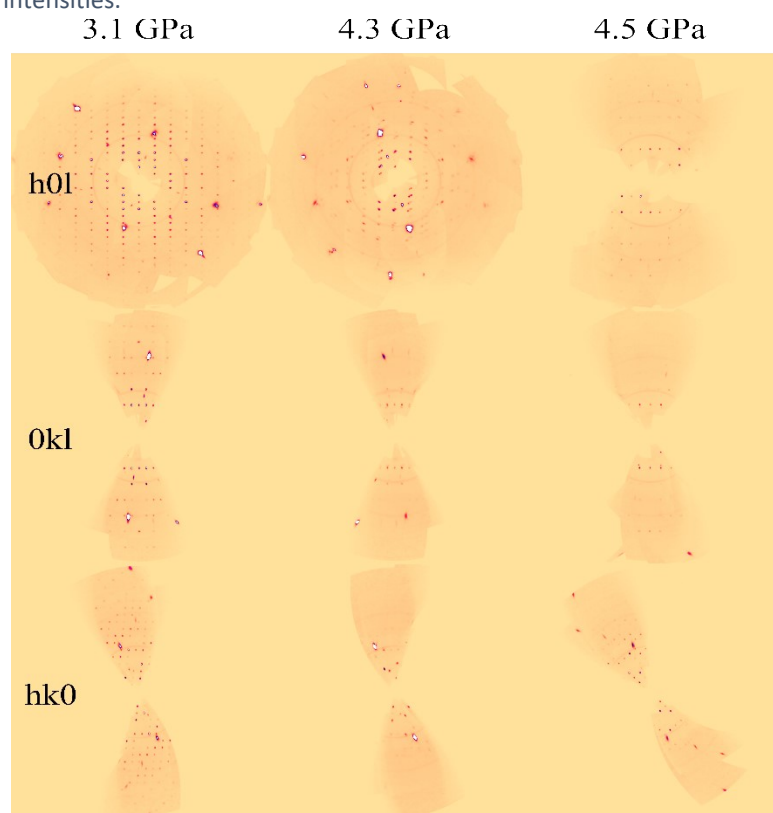

## Supporting Information

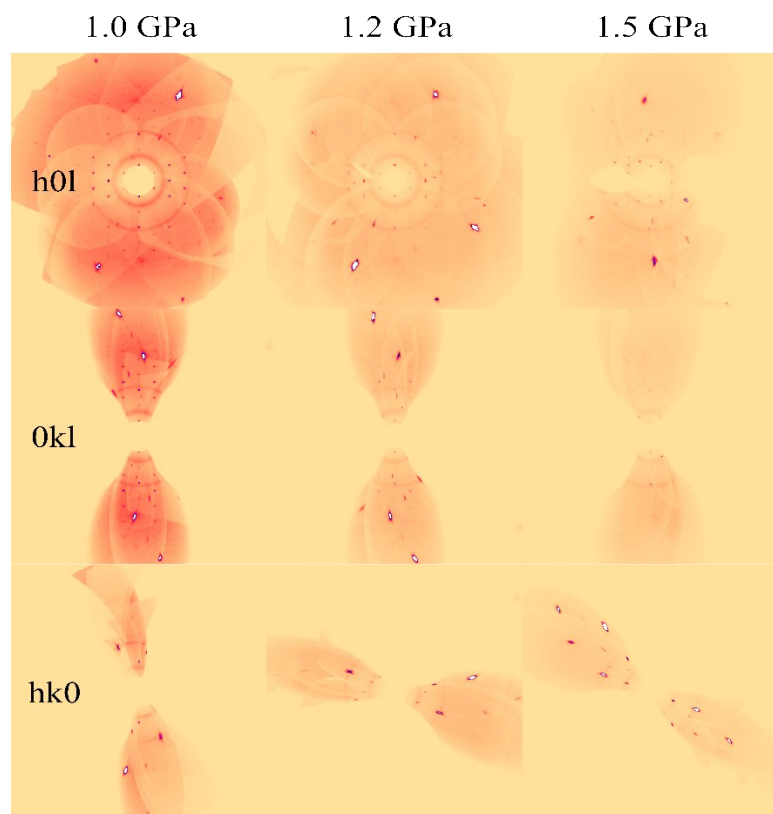

Figure S20. Reconstruction of reciprocal layers for the  $\text{Cu}(\text{HDA})_2(\text{MeCN})_2 \cdot$  crystal, showing decrease in the reflection intensities.

Reference:

- (1) Macrae, C. F.; Bruno, I. J.; Chisholm, J. A.; Edgington, P. R.; McCabe, P.; Pidcock, E.; Rodriguez-monge, L.; Taylor, R.; Streek, J. Van De; Wood, P. A. Mercury CSD 2.0 – New Features for the Visualization and Investigation of Crystal Structures. *J. Appl. Cryst.* **2008**, *41*, 466–470. <https://doi.org/10.1107/S0021889807067908>.

**Table S1.** Selected large volume changes at phase transitions and compressibilities of our coordination polymers and other compounds reported in the literature.

| Material                                                    | Application    | $\Delta V/V$ (%) at $p_c$                                                                | Volume compressibility ( $\text{GPa}^{-1}$ ) at 0.1 MPa    | Reference              |
|-------------------------------------------------------------|----------------|------------------------------------------------------------------------------------------|------------------------------------------------------------|------------------------|
| $\text{Cd}(\text{HDA})_2(\text{NO}_3)_2$                    | Shock-absorber | $(\alpha \rightarrow \beta)$ 5% at 1.1 GPa<br>$(\beta \rightarrow \gamma)$ 1% at 2.0 GPa | $\alpha$ 0.092(2)<br>$\beta$ 0.027(3)<br>$\gamma$ 0.062(2) | This work              |
| $\text{Cd}_2(\text{HDA})_3(\text{NO}_3)_4$                  | Shock-absorber | 4% at 1.5 GPa                                                                            | $\alpha$ 0.141(4)<br>$\beta$ 0.043(2)                      | This work              |
| $\text{Cu}(\text{HDA})_2(\text{MeCN})_2 \cdot 2\text{BF}_4$ | Shock-absorber | N/A                                                                                      | 0.219(2)                                                   | This work              |
| MIL53(Al)                                                   | Nano-shock     | 41% at 19                                                                                | Theory prediction                                          | <i>Chem. Commun.</i> , |

## Supporting Information

|                                         |                  |                 |           |                      |                                                              |
|-----------------------------------------|------------------|-----------------|-----------|----------------------|--------------------------------------------------------------|
|                                         | absorber         | MPa             |           |                      | <b>2014</b> , 50, 9462                                       |
| MIL53(Cr)                               | Nano-damper      | 6% at 53.5 MPa  | N/A       |                      | <i>J. Phys. Chem. C</i> <b>2012</b> , 116, 13289-13295       |
| CUK-1                                   | Nano-springs     | 21% at 0.4 GPa  | I<br>II   | 0.292(3)<br>0.068(3) | <i>Chem. Sci.</i> , <b>2021</b> , 12, 5682                   |
| MHy <sub>2</sub> PbBr <sub>4</sub>      | Photodetector    | 1% at 4.1 GPa   | III<br>IV | 0.043(1)<br>0.026(1) | <i>Chem. Mater.</i> <b>2022</b> , 34, 7867–7877              |
| [FA]Mn(H <sub>2</sub> POO) <sub>3</sub> | Solar-cell       | 2% at 3.9 GPa   | α<br>γ    | 0.030(1)<br>0.003(2) | <i>J. Phys. Chem. C</i> <b>2021</b> , 125, 26958-26966       |
| AMU3·DMF                                | Sensor           | 2% at 0.4 GPa   | α<br>β    | 0.128(3)<br>0.024(2) | <i>Mater. Adv.</i> <b>2021</b> , 2, 4677-4684                |
| AMU3·MeCN                               | Sensor           | 1% at 0.7 GPa   | α<br>β    | 0.051(2)<br>0.005(2) | <i>Mater. Adv.</i> <b>2021</b> , 2, 4677-4684                |
| Ag <sub>3</sub> [Co(CN) <sub>6</sub> ]  | Optical material | 16% at 0.19 GPa | I<br>II   | 0.152(2)<br>0.026(3) | <i>Proc. Natl. Acad. Sci.</i> <b>2008</b> , 105, 18708-18713 |
| T[PrA][Mn(dca) <sub>3</sub> ]           | Barocaloric      | 1% at 6.89 MPa  | N/A       |                      | <i>Nat. Commun.</i> , <b>2017</b> 8, 15715                   |
| NPG                                     | barocaloric      | 4.9%            | N/A       |                      | <i>Nat. Commun.</i> , <b>2019</b> 10, 1803                   |

**Table S2.** Crystallographic data of Cd(HDA)<sub>2</sub>(NO<sub>3</sub>)<sub>2</sub> phases  $\alpha$ ,  $\beta$  and  $\gamma$ .

| Phase                                        | $\beta$                            | $\alpha\beta$      | $\alpha$           | $\gamma$            | $\alpha$           | $\gamma$           | $\beta$            | $\gamma$             | $\beta$            | $\gamma$           | $\beta$       | $\gamma\beta$ | $\beta$       | $\gamma$      |
|----------------------------------------------|------------------------------------|--------------------|--------------------|---------------------|--------------------|--------------------|--------------------|----------------------|--------------------|--------------------|---------------|---------------|---------------|---------------|
| CCDC number                                  | 2262346                            | 2262347            | 2262348            | 2262348             | 2262340            | 2262349            | 2262341            | 2262350              | 2262342            | 2262343            | 2262344       | 2262344       | 2262353       | 2262353       |
| Pressure                                     | 0.0001                             | 0.2                | 0.5                | 0.5                 | 0.85               | 1.1                | 1.25               | 1.4                  | 1.5                | 1.65               |               |               |               |               |
| Temperature (K)                              | 293                                | 293                | 293                | 293                 | 293                | 293                | 293                | 293                  | 293                | 293                | 293           | 293           | 293           | 293           |
| Formula weight                               | 234.42                             | 234.42             | 234.26             | 233.32              | 234.42             | 234.42             | 234.42             | 234.42               | 234.42             | 234.42             | 234.42        | 234.42        | 234.42        | 234.42        |
| Wavelength (Å)                               | 0.71073                            | 0.71073            | 0.71073            | 0.71073             | 0.71073            | 0.71073            | 0.71073            | 0.71073              | 0.71073            | 0.71073            | 0.71073       | 0.71073       | 0.71073       | 0.71073       |
| Crystal system                               | tetragonal                         | tetragonal         | tetragonal         | tetragonal          | triclinic          | triclinic          | triclinic          | triclinic            | triclinic          | triclinic          | triclinic     | triclinic     | triclinic     | triclinic     |
| Space group                                  | $I4_1/a$                           | $I4_1/a$           | $I4_1/a$           | $I4_1/a$            | $\rho\bar{1}$      | $\rho\bar{1}$      | $\rho\bar{1}$      | $\rho\bar{1}$        | $\rho\bar{1}$      | $\rho\bar{1}$      | $\rho\bar{1}$ | $\rho\bar{1}$ | $\rho\bar{1}$ | $\rho\bar{1}$ |
| Unit cell dimensions                         |                                    |                    |                    |                     |                    |                    |                    |                      |                    |                    |               |               |               |               |
| $a$ (Å)                                      | 9.7855(7)                          | 9.7210(7)          | 9.6225(8)          | 9.5693(6)           | 9.350(2)           | 9.350(2)           | 9.369(2)           | 9.3296(18)           | 9.3399(16)         | 9.340(3)           |               |               |               |               |
| $b$ (Å)                                      | 9.7855(7)                          | 9.7210(7)          | 9.6225(8)          | 9.5693(6)           | 9.7253(18)         | 9.7253(18)         | 9.730(2)           | 9.719(3)             | 9.7227(16)         | 9.701(4)           |               |               |               |               |
| $c$ (Å)                                      | 21.071(3)                          | 21.012(2)          | 20.790(3)          | 20.504(3)           | 11.181(5)          | 11.181(5)          | 11.176(3)          | 11.132(6)            | 11.104(3)          | 11.109(4)          |               |               |               |               |
| $\alpha$ (°)                                 | 90                                 | 90                 | 90                 | 90                  | 110.90(3)          | 110.90(3)          | 111.06(2)          | 110.81(4)            | 110.89(2)          | 111.06(4)          |               |               |               |               |
| $\beta$ (°)                                  | 90                                 | 90                 | 90                 | 90                  | 105.07(3)          | 105.07(3)          | 105.360(20)        | 105.15(3)            | 105.022(19)        | 105.20(3)          |               |               |               |               |
| $\gamma$ (°)                                 | 90                                 | 90                 | 90                 | 90                  | 95.909(17)         | 95.909(17)         | 95.987(19)         | 95.96(2)             | 96.004(14)         | 95.86(3)           |               |               |               |               |
| Volume (Å <sup>3</sup> )                     | 2017.7(4)                          | 1985.6(4)          | 1925.0(4)          | 1877.5(4)           | 895.3(5)           | 895.3(5)           | 893.9(4)           | 888.7(6)             | 887.9(4)           | 884.6(6)           |               |               |               |               |
| Z/Z'                                         | 8/0.5                              | 8/0.5              | 8/0.5              | 8/0.5               | 4/2                | 4/2                | 4/2                | 4/2                  | 4/2                | 4/2                |               |               |               |               |
| Molecular volume (V/Z)                       | 252.21                             | 248.2              | 240.625            | 234.69              | 223.82             | 223.82             | 223.47             | 222.17               | 221.98             | 221.15             |               |               |               |               |
| Calculated density (g/cm <sup>3</sup> )      | 1.543                              | 1.568              | 1.617              | 1.651               | 1.709              | 1.709              | 1.742              | 1.752                | 1.754              | 1.760              |               |               |               |               |
| Absorption (mm <sup>-1</sup> )               | 1.120                              | 1.138              | 1.174              | 1.203               | 1.261              | 1.261              | 1.264              | 1.272                | 1.273              | 1.278              |               |               |               |               |
| $F(000)$                                     | 968.0                              | 968.0              | 967.0              | 963.0               | 468.0              | 468.0              | 484.0              | 484.0                | 484.0              | 484.0              |               |               |               |               |
| Crystal size (mm)                            | 0.099 × 0.067 × 0.056              | 0.25 × 0.16 × 0.05 | 0.25 × 0.16 × 0.05 | 0.25 × 0.16 × 0.05  | 0.24 × 0.15 × 0.05 | 0.24 × 0.15 × 0.05 | 0.24 × 0.15 × 0.05 | 0.24 × 0.15 × 0.05   | 0.24 × 0.15 × 0.05 | 0.24 × 0.15 × 0.05 |               |               |               |               |
| 2 $\theta$ -range for data collection (°)    | 7.046 to 57.566                    | 8.386 to 52.606    | 7.158 to 52.85     | 7.216 to 59.988     | 4.592 to 54.042    | 4.592 to 54.042    | 4.13 to 56.774     | 6.898 to 51.33       | 4.596 to 56.574    | 4.15 to 56.496     |               |               |               |               |
| Min/max indices: $h, k, l$                   | -13/13,-6/7,-13/27                 | -12/12,-5/6,-24/23 | -9/9,-10/10,-24/24 | -10/9,-11/11,-25/26 | -11/11,-12/12,-9/9 | -11/11,-12/12,-9/9 | -8/8,-11/11,-14/14 | -11/11,-11/11,-11/11 | -12/12,-12/12,-8/8 | -7/7,-11/10,-13/13 |               |               |               |               |
| Reflect. Collected/unique                    | 1809/949                           | 4280/671           | 2434/586           | 3228/687            | 5566/852           | 5566/852           | 15465/1139         | 5909/858             | 7141/891           | 6284/87            |               |               |               |               |
| $R_{int}$                                    | 0.0270                             | 0.1310             | 0.0383             | 0.0642              | 0.1353             | 0.1353             | 0.1148             | 0.2850               | 0.1418             | 0.1620             |               |               |               |               |
| Refinement method                            | Full-matrix least-squares on $F^2$ |                    |                    |                     |                    |                    |                    |                      |                    |                    |               |               |               |               |
| Completeness (%)                             | 84.3                               | 69.5               | 62.8               | 64.0                | 35.6               | 35.6               | 40.05              | 25.8                 | 34.7               | 35.8               |               |               |               |               |
| Data/restraints/parameters                   | 949/1/68                           | 671/6/68           | 586/0/68           | 687/0/62            | 852/400/226        | 852/400/226        | 1139/403/227       | 858/406/226          | 891/403/226        | 877/300/226        |               |               |               |               |
| Goodness-of-fit on $F^2$                     | 1.078                              | 1.167              | 1.040              | 1.162               | 1.675              | 1.675              | 1.080              | 1.808                | 1.101              | 1.084              |               |               |               |               |
| Final $R1/wR^2$ ( $I > 2\sigma_1$ )          | 0.0457/0.0816                      | 0.0771/0.1761      | 0.0322/0.0636      | 0.0669/0.1172       | 0.1154/0.3078      | 0.1154/0.3078      | 0.0806/0.1835      | 0.1980/0.4378        | 0.0851/0.2049      | 0.0866/0.2119      |               |               |               |               |
| $R1/wR^2$ (all data)                         | 0.0726/0.0944                      | 0.1322/0.2479      | 0.0501/0.0693      | 0.1133/0.1731       | 0.1691/0.3855      | 0.1691/0.3855      | 0.1078/0.2064      | 0.2897/0.5365        | 0.1307/0.2517      | 0.1071/0.2348      |               |               |               |               |
| Largest diff. peak/hole (e.Å <sup>-3</sup> ) | 0.27/-0.29                         | 0.51/-0.52         | 0.27/-0.24         | 0.69/-0.74          | 0.84/-0.90         | 0.84/-0.90         | 0.57/-0.60         | 0.94/-0.89           | 0.71/-0.86         | 0.65/-0.80         |               |               |               |               |

$$w=1/(\sigma^2 F_o^2 + w_1^2 * P^2 + w_2 * P), \text{ where } P=(\text{Max}(F_o^2, 0) + 2 * F_c^2)$$



|                                              |                                    |                      |                       |                      |                      |                      |                      |                      |
|----------------------------------------------|------------------------------------|----------------------|-----------------------|----------------------|----------------------|----------------------|----------------------|----------------------|
| Pressure                                     | 1.77                               | 1.96                 | 2.1                   | 2.3                  | 2.55                 | 2.8                  | 3.3                  | 3.7                  |
| Temperature (K)                              | 293                                | 293                  | 293                   | 293                  | 293                  | 293                  | 293                  | 293                  |
| Formula weight                               | 234.42                             | 234.42               | 234.42                | 234.42               | 234.42               | 234.42               | 234.42               | 234.42               |
| Wavelength (Å)                               | 0.71073                            | 0.71073              | 0.71073               | 0.71073              | 0.71073              | 0.71073              | 0.71073              | 0.71073              |
| Phase                                        | $\alpha$                           |                      | $\alpha$              | $\alpha$             | $\delta$             | $\delta$             |                      | $\alpha$             |
| Crystal system                               | triclinic                          | triclinic            | triclinic             | triclinic            | triclinic            | triclinic            | triclinic            | triclinic            |
| Space group                                  | $\bar{P}1$                         | $\bar{P}1$           | $\bar{P}1$            | $\bar{P}1$           | $\bar{P}1$           | $\bar{P}1$           | $\bar{P}1$           | $\bar{P}1$           |
| Unit cell dimensions                         |                                    |                      |                       |                      |                      |                      |                      |                      |
| $a$ (Å)                                      | 9.319(3)                           | 9.2950(18)           | 9.264(3)              | 9.234(2)             | 9.202(3)             | 9.188(2)             | 9.147(2)             | 9.127(2)             |
| $b$ (Å)                                      | 9.7075(18)                         | 9.6793(19)           | 9.585(3)              | 9.5879(16)           | 9.608(2)             | 9.5899(16)           | 9.5510(17)           | 9.5346(18)           |
| $c$ (Å)                                      | 11.051(5)                          | 10.957(3)            | 11.069(4)             | 10.970(5)            | 10.973(6)            | 10.926(4)            | 10.842(5)            | 10.805(5)            |
| $\alpha$ (°)                                 | 110.92(3)                          | 110.80(2)            | 110.41(3)             | 110.44(3)            | 110.88(4)            | 110.87(2)            | 110.73(3)            | 110.62(3)            |
| $\beta$ (°)                                  | 104.97(3)                          | 104.87(2)            | 105.98(3)             | 106.00(3)            | 106.16(4)            | 106.04(3)            | 106.08(3)            | 106.02(3)            |
| $\gamma$ (°)                                 | 96.149(18)                         | 96.250(16)           | 97.17(3)              | 97.186(17)           | 97.29(2)             | 97.405(17)           | 97.435(17)           | 97.498(18)           |
| Volume (Å <sup>3</sup> )                     | 879.9(5)                           | 868.6(4)             | 858.6(5)              | 848.0(5)             | 842.5(6)             | 836.4(4)             | 823.5(5)             | 818.3(5)             |
| Z/Z'                                         | 4/2                                | 4/2                  | 4/2                   | 4/2                  | 4/2                  | 4/2                  | 4/2                  | 4/2                  |
| Molecular volume (V/Z)                       | 219.98                             | 217.15               | 214.65                | 212.0                | 210.62               | 209.10               | 205.87               | 204.57               |
| Calculated density (g/cm <sup>3</sup> )      | 1.770                              | 1.793                | 1.813                 | 1.836                | 1.848                | 1.862                | 1.883                | 1.899                |
| Absorption (mm <sup>-1</sup> )               | 1.284                              | 1.301                | 1.316                 | 1.333                | 1.341                | 1.351                | 1.372                | 1.381                |
| $F(000)$                                     | 484.0                              | 484.0                | 484.0                 | 484.0                | 484.0                | 484.0                | 484.0                | 484.0                |
| Crystal size (mm)                            | 0.24 × 0.15 × 0.05                 | 0.24 × 0.15 × 0.05   | 0.24 × 0.15 × 0.05    | 0.24 × 0.15 × 0.05   | 0.24 × 0.15 × 0.05   | 0.24 × 0.15 × 0.05   | 0.24 × 0.15 × 0.05   | 0.24 × 0.15 × 0.05   |
| 2 $\theta$ -range for data collection (°)    | 4.606 to 56.526                    | 4.616 to 56.56       | 5.772 to 59.798       | 7.308 to 49.648      | 4.69 to 56.71        | 4.698 to 55.666      | 4.714 to 56.584      | 4.718 to 56.344      |
| Min/max indices: $h, k, l$                   | -12/12, -12/12, -8/8               | -12/12, -12/12, -8/8 | -11/11, -9/10, -10/10 | -10/10, -11/11, -9/9 | -12/11, -12/12, -8/9 | -11/11, -12/12, -8/8 | -11/11, -12/12, -9/9 | -11/11, -12/12, -9/9 |
| Reflect. Collected/unique                    | 6027/885                           | 5986/858             | 5871/985              | 5773/665             | 5255/826             | 5631/788             | 6161/825             | 7462/806             |
| $R_{int}$                                    | 0.0895                             | 0.0810               | 0.1217                | 0.1092               | 0.1037               | 0.0932               | 0.0762               | 0.1696               |
| Refinement method                            | Full-matrix least-squares on $F^2$ |                      |                       |                      |                      |                      |                      |                      |
| Completeness (%)                             | 34.1                               | 34.6                 | 25.7                  | 22.8                 | 34.7                 | 34.2                 | 35.3                 | 35.8                 |
| Data/restraints/parameters                   | 885/421/227                        | 858/386/226          | 985/208/208           | 665/386/208          | 826/464/197          | 788/363/209          | 825/409/208          | 806/443/208          |
| Goodness-of-fit on $F^2$                     | 1.111                              | 1.164                | 1.056                 | 1.589                | 1.073                | 1.057                | 1.068                | 1.731                |
| Final $R1/wR^2$ ( $I > 2\sigma 1$ )          | 0.0949/0.2060                      | 0.0888/0.2164        | 0.0732/0.1909         | 0.1111/0.3163        | 0.0957/0.2051        | 0.1094/0.2692        | 0.0879/0.1954        | 0.1337/0.3530        |
| $R1/wR^2$ (all data)                         | 0.1599/0.2567                      | 0.1438/0.2706        | 0.1497/0.2402         | 0.1506/0.3571        | 0.1652/0.2626        | 0.1402/0.3037        | 0.1206/0.2253        | 0.1802/0.4103        |
| Largest diff. peak/hole (e.Å <sup>-3</sup> ) | 0.75/-0.68                         | 0.78/-0.87           | 0.34/-0.31            | 0.61/-0.83           | 0.83/-0.62           | 0.88/-0.67           | 0.83/-0.83           | 0.89/-1.36           |

$w=1/(\sigma^2 F_o^2 + w_1^2 * P^2 + w_2 * P)$ , where  $P=(\text{Max}(F_o^2, 0) + 2 * F_c^2)$

**Table S2.** Crystallographic data of Cd(HDA)<sub>2</sub>(NO<sub>3</sub>)<sub>2</sub> phases  $\alpha$  and  $\delta$ .

|                                              |                                    |                       |                       |                       |                       |                       |
|----------------------------------------------|------------------------------------|-----------------------|-----------------------|-----------------------|-----------------------|-----------------------|
| CCDC number                                  | 2262371                            | 2262354               | 2262355               | 2262356               | 2262357               | 2262358               |
| Pressure                                     | 0.0001                             | 0.0001                | 0.0001                | 0.0001                | 0.0001                | 0.0001                |
| Phase                                        | $\alpha$                           | $\beta$               | $\alpha$              | $\beta$               | $\beta$               | $\beta$               |
| Temperature (K)                              | 293                                | 250                   | 200                   | 150                   | 100                   | 100*                  |
| CCDC number                                  | 2262359                            | 2262360               | 2262361               | 2262362               | 2262363               | 2262364               |
| Formula weight                               | 234.42                             | 234.42                | 234.42                | 468.83                | 468.83                | 234.42                |
| Pressure                                     | 0.0001                             | 0.4                   | 1.2                   | 2.1                   | 3.1                   | 4.3                   |
| Wavelength (Å)                               | 0.71073                            | 0.71073               | 0.71073               | 0.71073               | 0.71073               | 0.71073               |
| Crystal system                               | tetragonal                         | tetragonal            | tetragonal            | triclinic             | triclinic             | tetragonal            |
| Space group                                  | $I4_1/a$                           | $I4_1/a$              | $I4_1/a$              | $P\bar{1}$            | $P\bar{1}$            | $I4_1/a$              |
| Unit cell dimensions                         |                                    |                       |                       |                       |                       |                       |
| $a$ (Å)                                      | 9.7855(7)                          | 9.6193(2)             | 9.5708(2)             | 9.9696(8)             | 9.9729(8)             | 9.5843(7)             |
| $b$ (Å)                                      | 9.7855(7)                          | 9.6193(2)             | 9.5708(2)             | 12.2010(9)            | 12.1703(10)           | 9.5843(7)             |
| $c$ (Å)                                      | 21.071(3)                          | 21.2771(8)            | 21.3382(7)            | 18.1134(16)           | 18.0586(17)           | 20.900(2)             |
| $\alpha$ (°)                                 | 90                                 | 90                    | 90                    | 74.552(7)             | 74.687(7)             | 90                    |
| $\beta$ (°)                                  | 90                                 | 90                    | 90                    | 74.701(7)             | 74.744(7)             | 90                    |
| $\gamma$ (°)                                 | 90                                 | 90                    | 90                    | 68.229(7)             | 68.239(7)             | 90                    |
| Volume (Å <sup>3</sup> )                     | 2017.7(4)                          | 1968.79(11)           | 1954.58(10)           | 1938.4(3)             | 1929.7(3)             | 1919.9(3)             |
| Z/Z'                                         | 8/0.5                              | 8/0.5                 | 8/0.5                 | 8/4                   | 8/4                   | 8/0.5                 |
| Molecular volume (V/Z)                       | 252.21                             | 246.10                | 244.32                | 242.30                | 241.21                | 240.00                |
| Calculated density (g/cm <sup>3</sup> )      | 1.543                              | 1.582                 | 1.593                 | 1.607                 | 1.614                 | 1.622                 |
| Absorption (mm <sup>-1</sup> )               | 1.120                              | 1.148                 | 1.156                 | 1.166                 | 1.171                 | 1.177                 |
| $F(000)$                                     | 968.0                              | 968.0                 | 968.0                 | 968.0                 | 968.0                 | 968.0                 |
| Crystal size (mm)                            | 0.099 × 0.067 × 0.056              | 0.307 × 0.213 × 0.127 | 0.307 × 0.213 × 0.127 | 0.307 × 0.213 × 0.127 | 0.307 × 0.213 × 0.127 | 0.325 × 0.256 × 0.198 |
| 2 $\theta$ -range for data collection (°)    | 7.046 to 57.566                    | 4.648 to 61.302       | 4.664 to 61.208       | 5.422 to 52.746       | 4.664 to 61.304       | 7.166 to 56.718       |
| Min/max indices: $h, k, l$                   | -13/13,-6/7,-13/27                 | -12/13,-13/13,-28/29  | -12/13,-13/13,-28/29  | -12/12,-15/15,-22/22  | -14/13,-17/17,-24/25  | -12/12,-10/12,-25/27  |
| Reflect. Collected/unique                    | 1809/949                           | 12931/1449            | 12842/1444            | 19863/7845            | 23553/10332           | 5245/1155             |
| $R_{int}$                                    | 0.0270                             | 0.0330                | 0.0316                | 0.0687                | 0.0774                | 0.0358                |
| Refinement method                            | Full-matrix least-squares on $F^2$ |                       |                       |                       |                       |                       |
| Completeness (%)                             | 84.3                               | 100                   | 100                   | 99.2                  | 99.2                  | 99.1                  |
| Data/restraints/parameters                   | 949/1/68                           | 1449/0/68             | 1444/0/68             | 7845/12/451           | 10332/0/451           | 1155/31/68            |
| Goodness-of-fit on $F^2$                     | 1.078                              | 1.071                 | 1.059                 | 1.088                 | 1.088                 | 1.180                 |
| Final $R1/wR^2$ ( $I > 2\sigma_1$ )          | 0.0457/0.0816                      | 0.0261/0.0572         | 0.0212/0.0463         | 0.0862/0.2192         | 0.0939/0.2258         | 0.0713/0.1590         |
| $R1/wR^2$ (all data)                         | 0.0726/0.0944                      | 0.0337/0.0598         | 0.0269/0.0486         | 0.1280/0.2468         | 0.1538/0.2613         | 0.0775/0.1613         |
| Largest diff. peak/hole (e.Å <sup>-3</sup> ) | 0.27/-0.29                         | 0.39/-0.21            | 0.31/-0.18            | 3.81/-1.14            | 4.95/-1.44            | 1.51/-0.83            |

$$w=1/(\sigma^2 F_o^2+w_1^2 P^2+w_2^2 P), \text{ where } P=(\text{Max}(F_o, 0)+2^*F_c^2)$$

\*fast-cooled crystal

**Table S3.** Crystallographic data of Cd<sub>2</sub>(HDA)<sub>3</sub>(NO<sub>3</sub>)<sub>4</sub> phases  $\alpha$  and  $\beta$ .

|                                              |              |                                                                                        |                      |                      |                      |                      |                      |                      |                      |  |
|----------------------------------------------|--------------|----------------------------------------------------------------------------------------|----------------------|----------------------|----------------------|----------------------|----------------------|----------------------|----------------------|--|
| Temperature (K)                              |              | 293                                                                                    | 293                  | 293                  | 293                  | 293                  | 293                  | 293                  | 293                  |  |
| Formula weight                               |              | 410.73                                                                                 | 410.73               | 410.73               | 410.73               | 410.73               | 410.73               | 410.73               | 410.73               |  |
| Phase                                        | $\alpha$     |                                                                                        | $\alpha$             | $\alpha$             | $\alpha$             | $\alpha$             | $\alpha$             | $\alpha$             | $\alpha^*$           |  |
| Wavelength (Å)                               |              | 0.71073                                                                                | 0.71073              | 0.71073              | 0.71073              | 0.71073              | 0.71073              | 0.71073              | 0.71073              |  |
| CCDC number                                  |              | 2262365                                                                                | 2262366              | 2262367              | 2262368              | 2262369              | 2262370              | 2262370              | 2262370              |  |
| Crystal system                               |              | monoclinic                                                                             | monoclinic           | monoclinic           | monoclinic           | monoclinic           | monoclinic           | monoclinic           | monoclinic           |  |
| Space group                                  |              | $P2_1/n$                                                                               | $P2_1/n$             | $P2_1/n$             | $P2_1$               | $P2_1$               | $P2_1$               | $P2_1$               | $P2_1$               |  |
| Unit cell dimensions                         | $a$ (Å)      | 14.3304(4)                                                                             | 14.316(10)           | 14.276(14)           | 14.206(12)           | 14.188(11)           | 14.188(11)           | 14.188(11)           | 14.10(4)             |  |
|                                              | $b$ (Å)      | 7.0034(2)                                                                              | 6.8838(4)            | 6.7318(5)            | 6.6183(4)            | 6.5088(3)            | 6.5088(3)            | 6.5088(3)            | 6.4726(15)           |  |
|                                              | $c$ (Å)      | 16.3600(7)                                                                             | 15.7250(18)          | 15.218(2)            | 14.9354(14)          | 14.7051(11)          | 14.7051(11)          | 14.7051(11)          | 14.568(5)            |  |
|                                              | $\alpha$ (°) | 90                                                                                     | 90                   | 90                   | 90                   | 90                   | 90                   | 90                   | 90                   |  |
|                                              | $\beta$ (°)  | 97.033(3)                                                                              | 97.17(3)             | 96.72(4)             | 96.11(3)             | 95.70(3)             | 95.70(3)             | 95.70(3)             | 94.60(11)            |  |
|                                              | $\gamma$ (°) | 90                                                                                     | 90                   | 90                   | 90                   | 90                   | 90                   | 90                   | 90                   |  |
| Volume (Å <sup>3</sup> )                     |              | 1629.56(10)                                                                            | 1537.5(11)           | 1452.5(14)           | 1396.2(12)           | 1351.2(10)           | 1351.2(10)           | 1351.2(10)           | 1325(4)              |  |
| Z/Z'                                         |              | 4/1                                                                                    | 4/1                  | 4/1                  | 4/1                  | 4/1                  | 4/1                  | 4/1                  | 4/1                  |  |
| Molecular volume (V/Z)                       |              | 407.39                                                                                 | 384.37               | 363.12               | 349.05               | 337.80               | 337.80               | 337.80               | 331.25               |  |
| Calculated density (g/cm <sup>3</sup> )      |              | 1.674                                                                                  | 1.774                | 1.878                | 1.954                | 2.019                | 2.019                | 2.019                | 2.059                |  |
| Absorption (mm <sup>-1</sup> )               |              | 1.373                                                                                  | 1.455                | 1.540                | 1.602                | 1.655                | 1.655                | 1.655                | 1.688                |  |
| F(000)                                       |              | 836.0                                                                                  | 836.0                | 836.0                | 836.0                | 836.0                | 836.0                | 836.0                | 836.0                |  |
| Crystal size (mm)                            |              | 0.324 × 0.222 × 0.193                                                                  | 0.385 × 0.293 × 0.08 | 0.385 × 0.293 × 0.08 | 0.385 × 0.293 × 0.08 | 0.385 × 0.293 × 0.08 | 0.385 × 0.293 × 0.08 | 0.385 × 0.293 × 0.08 | 0.385 × 0.293 × 0.08 |  |
| 2 $\theta$ -range for data collection (°)    |              | 5.728 to 56.624                                                                        | 5.222 to 52.998      | 3.702 to 53.334      | 5.486 to 53.508      | 5.568 to 53.32       | 5.568 to 53.32       | 5.568 to 53.32       | 3.868 to 49.408      |  |
| Min/max indices: $h, k, l$                   |              | -17/15,-8/9,-19/17                                                                     | -8/8,-8/8,-19/19     | -8/8,-8/8,-18/18     | -7/7,-8/8,-18/18     | -7/7,-8/8,-17/18     | -7/7,-8/8,-17/18     | -7/7,-8/8,-17/18     | -7/7,-7/7,-17/17     |  |
| Reflect. Collected/unique                    |              | 11904/3524                                                                             | 12275/1061           | 11532/1001           | 11452/1834           | 10939/1726           | 10939/1726           | 10939/1726           | 8713/1508            |  |
| R <sub>int</sub>                             |              | 0.0244                                                                                 | 0.0727               | 0.0943               | 0.0821               | 0.0580               | 0.0580               | 0.0580               | 0.3401               |  |
| Refinement method                            |              | Full-matrix least-squares on F <sup>2</sup>                                            |                      |                      |                      |                      |                      |                      |                      |  |
| Completeness (%)                             |              | 99.9                                                                                   | 35.3                 | 35.0                 | 33.3                 | 32.9                 | 32.9                 | 32.9                 | 33.1                 |  |
| Data/restraints/parameters                   |              | 3524/6/190                                                                             | 1061/172/184         | 1001/151/190         | 1834/518/380         | 1726/716/379         | 1726/716/379         | 1726/716/379         | 1508/800/313         |  |
| Goodness-of-fit on F <sup>2</sup>            |              | 1.033                                                                                  | 1.065                | 1.063                | 1.103                | 1.122                | 1.122                | 1.122                | 1.253                |  |
| Final R1/wR <sup>2</sup> (>2 $\sigma$ 1)     |              | 0.0369/0.0794                                                                          | 0.0479/0.1092        | 0.0524/0.1272        | 0.0523/0.1262        | 0.0658/0.1799        | 0.0658/0.1799        | 0.0658/0.1799        | 0.1558/0.3622        |  |
| R1/wR <sup>2</sup> (all data)                |              | 0.0529/0.0885                                                                          | 0.0842/0.1301        | 0.0848/0.1518        | 0.0807/0.1579        | 0.0915/0.2495        | 0.0915/0.2495        | 0.0915/0.2495        | 0.2921/0.4524        |  |
| Largest diff. peak/hole (e.Å <sup>-3</sup> ) |              | 1.36/-0.73                                                                             | 0.51/-0.71           | 0.50/-0.41           | 0.40/-0.56           | 0.90/-1.36           | 0.90/-1.36           | 0.90/-1.36           | 0.82/-0.61           |  |
|                                              |              | $w=1/(\sigma^2 F_o^2+w_1^2 * P^2+w_2 * P)$ , where $P=(\text{Max}(F_o^2,0)+2 * F_c^2)$ |                      |                      |                      |                      |                      |                      |                      |  |

**Table S4.** Crystallographic data of Cu(HDA)<sub>2</sub>(MeCN)<sub>2</sub>·2BF<sub>4</sub>.

|                                              |              |                                                    |                      |                      |                      |                      |                       |           |
|----------------------------------------------|--------------|----------------------------------------------------|----------------------|----------------------|----------------------|----------------------|-----------------------|-----------|
| Pressure                                     | 0.0001       | 0.15                                               | 0.4                  | 0.7                  | 1.0                  | 0.0001               | 1.2*                  |           |
| Temperature (K)                              | 293          | 293                                                | 293                  | 293                  | 293                  | 100                  | 293                   |           |
| Formula weight                               | 551.68       | 551.68                                             | 551.68               | 551.68               | 551.68               | 551.68               | 551.68                |           |
| Wavelength (Å)                               | 0.71073      | 0.71073                                            | 0.71073              | 0.71073              | 0.71073              | 0.71073              | 0.71073               |           |
| Crystal system                               | orthorhombic | orthorhombic                                       | orthorhombic         | orthorhombic         | orthorhombic         | orthorhombic         | orthorhombic          |           |
| Space group                                  | <i>Fddd</i>  | <i>Fddd</i>                                        | <i>Fddd</i>          | <i>Fddd</i>          | <i>Fddd</i>          | <i>Fddd</i>          | <i>Fddd</i>           |           |
| Unit cell dimensions                         | <i>a</i> (Å) | 12.9608(7)                                         | 12.99(4)             | 13.19(3)             | 13.23(3)             | 13.220(10)           | 13.084(2)             | 13.26(4)  |
|                                              | <i>b</i> (Å) | 14.1880(8)                                         | 13.946(12)           | 13.731(6)            | 13.517(6)            | 13.480(3)            | 13.9110(14)           | 13.340(9) |
|                                              | <i>c</i> (Å) | 27.6850(17)                                        | 27.191(7)            | 26.844(8)            | 26.501(5)            | 26.429(3)            | 27.113(3)             | 26.110(6) |
| Volume (Å <sup>3</sup> )                     |              | 5091.0(5)                                          | 4924(17)             | 4862(12)             | 4737(12)             | 4710(4)              | 4934.9(10)            | 4620(15)  |
| Z/Z'                                         |              | 8/0.25                                             | 8/0.25               | 8/0.25               | 8/0.25               | 8/0.25               | 8/0.25                | 8/0.25    |
| Molecular volume (V/Z)                       |              | 636.37                                             | 615.5                | 607.75               | 592.12               | 588.75               | 616.86                | 577.5     |
| Calculated density (g/cm <sup>3</sup> )      |              | 1.443                                              | 1.488                | 1.507                | 1.547                | 1.556                | 1.488                 |           |
| Absorption (mm <sup>-1</sup> )               |              | 0.933                                              | 0.963                | 0.976                | 1.001                | 1.007                | 0.962                 |           |
| <i>F</i> (000)                               |              | 2301.0                                             | 2296.0               | 2296.0               | 2296.0               | 2296.0               | 2300.0                |           |
| Crystal size (mm)                            |              | 0.438 × 0.322 × 0.111                              | 0.325 × 0.173 × 0.07 | 0.325 × 0.173 × 0.07 | 0.325 × 0.173 × 0.07 | 0.325 × 0.173 × 0.07 | 0.438 × 0.322 × 0.111 |           |
| 2 $\theta$ -range for data collection (°)    |              | 6.134 to 56.422                                    | 10.346 to 53.442     | 6.252 to 63.146      | 6.15 to 57.094       | 8.838 to 56.92       | 6.01 to 57.842        |           |
| Min/max indices: <i>h, k, l</i>              |              | -16/16,-11/18,-36/20                               | -6/7,-15/16,-31/34   | -6/6,-19/13, -28/28  | -6/6,-13/13,-35/35   | -6/6,-16/15,-35/35   | -11/15,-18/18, -20/36 |           |
| Reflect. Collected/unique                    |              | 3238/1347                                          | 2590/462             | 1551/516             | 2412/390             | 4151/497             | 3465/1277             |           |
| R <sub>int</sub>                             |              | 0.0278                                             | 0.3349               | 0.3341               | 0.3050               | 0.2052               | 0.0296                |           |
| Refinement method                            |              | Full-matrix least-squares on <i>F</i> <sup>2</sup> |                      |                      |                      |                      |                       |           |
| Completeness (%)                             |              | 99.7                                               | 39.5                 | 38.1                 | 34.2                 | 38.6                 | 90.1                  |           |
| Data/restraints/parameters                   |              | 1347/0/79                                          | 462/92/79            | 516/57/79            | 390/94/79            | 497/69/79            | 1277/0/79             |           |
| Goodness-of-fit on <i>F</i> <sup>2</sup>     |              | 1.059                                              | 0.901                | 0.868                | 0.939                | 0.983                | 1.067                 |           |
| Final R1/wR <sup>2</sup> (>2 $\sigma$ 1)     |              | 0.0533/0.1454                                      | 0.0921/0.1926        | 0.0887/0.1585        | 0.0869/0.2116        | 0.0770/0.1866        | 0.0477/0.1174         |           |
| R1/wR <sup>2</sup> (all data)                |              | 0.0603/0.1547                                      | 0.2220/0.2579        | 0.3838/0.2732        | 0.2445/0.2934        | 0.2296/0.2656        | 0.0555/0.1229         |           |
| Largest diff. peak/hole (e.Å <sup>-3</sup> ) |              | 0.80/-0.46                                         | 0.21/-0.26           | 0.23/-0.20           | 0.19/-0.28           | 0.22/-0.21           | 0.89/-0.42            |           |

$w=1/(\sigma^2 F_o^2+w_1^2 * P^2+w_2 * P)$ , where  $P=(\text{Max}(F_o^2,0)+2 * F_c^2)$

\* The measurement at 1.2 GPa, due to the reduced reflections intensities caused by the partial amorphization of the sample, provides the unit-cell parameters only.

**Table S5.** Torsion angles of HDA linkers in Cd(HDA)<sub>2</sub>(NO<sub>3</sub>)<sub>2</sub> structures under pressure.

| Pressure (GPa) | HDA    | $\tau_0$ (°) | $\tau_1$ (°) | $\tau_2$ (°) | $\tau_3$ (°) | Conformation code |
|----------------|--------|--------------|--------------|--------------|--------------|-------------------|
| 0.0001         | Site A | 172.34       | 151.88       | 61.54        | 180          | TTG·T             |

|      |        |         |         |        |     |        |
|------|--------|---------|---------|--------|-----|--------|
|      | Site B | 172.34  | -168.77 | -71.49 | 180 | TTG-T  |
| 0.2  | Site A | 172.96  | 142.15  | 76.46  | 180 | TTG*T  |
|      | Site B | 172.96  | -169.07 | -71.14 | 180 | TTG-T  |
| 0.5  | Site A | 171.23  | 155.44  | 58.14  | 180 | TTG*T  |
|      | Site B | 171.23  | -167.26 | -67.03 | 180 | TTG-T  |
| 0.85 | Site A | 170.24  | 160.77  | 41.38  | 180 | TTG*T  |
|      | Site B | 170.24  | -165.47 | -82.52 | 180 | TTG-T  |
| 1.1  | HDA-1  | 170.32  | 176.97  | 63.85  | 180 | TTG*T  |
|      | HDA-2  | -169.37 | 176.57  | 158.89 | 180 | TTTT   |
|      | HDA-3  | 163.46  | -177.93 | -66.37 | 180 | TTG-T  |
|      | HDA-4  | -178.27 | 59.67   | 48.72  | 180 | TG*G*T |
| 1.25 | HDA-1  | -179.5  | 175.64  | 58.79  | 180 | TTG*T  |
|      | HDA-2  | -169.78 | 177.65  | 157.63 | 180 | TTTT   |
|      | HDA-3  | 163.12  | -178.01 | -62.4  | 180 | TTG-T  |
|      | HDA-4  | -178.59 | 64.95   | 49.61  | 180 | TG*G*T |
| 1.4  | HDA-1  | 174.62  | 173.42  | 73.72  | 180 | TTG*T  |
|      | HDA-2  | -164.26 | 152.54  | 148.73 | 180 | TTTT   |
|      | HDA-3  | 167.89  | 166.78  | -49.64 | 180 | TTG-T  |
|      | HDA-4  | -158.64 | 46.26   | 66.84  | 180 | TG*G*T |
| 1.5  | HDA-1  | 178.47  | 165.88  | 58.76  | 180 | TTG*T  |
|      | HDA-2  | -168.02 | -179.88 | 160.84 | 180 | TTTT   |
|      | HDA-3  | 156.14  | 178.28  | -58.48 | 180 | TTG-T  |
|      | HDA-4  | -175.59 | 47.27   | 64.09  | 180 | TG*G*T |
| 1.65 | HDA-1  | -177.38 | 177.74  | 56.32  | 180 | TTG*T  |
|      | HDA-2  | -170.47 | 174.4   | 153.76 | 180 | TTTT   |
|      | HDA-3  | 158.67  | -173.98 | -57.98 | 180 | TTG-T  |
|      | HDA-4  | -169.85 | 47.8    | 60.2   | 180 | TG*G*T |
| 1.77 | HDA-1  | 177.3   | 179.13  | 49.58  | 180 | TTG*T  |
|      | HDA-2  | -161.44 | -179.61 | 157.08 | 180 | TTTT   |
|      | HDA-3  | 158.02  | -179.48 | -65.05 | 180 | TTG-T  |
|      | HDA-4  | -177.6  | 55.41   | 58.86  | 180 | TG*G*T |
| 1.96 | HDA-1  | -179.15 | 176.03  | 59.42  | 180 | TTG*T  |
|      | HDA-2  | -171.27 | 179.89  | 159.36 | 180 | TTTT   |
|      | HDA-3  | 157.75  | 177.22  | -61.5  | 180 | TTG-T  |
|      | HDA-4  | -176.68 | 56.91   | 58.35  | 180 | TG*G*T |
| 2.1  | HDA-1  | 169.64  | 169.32  | 65.36  | 180 | TTG*T  |
|      | HDA-2  | -172.35 | -178.84 | 177.37 | 180 | TTTT   |
|      | HDA-3  | 167.63  | -178.12 | -70.72 | 180 | TTG-T  |
|      | HDA-4  | 171.9   | -58.72  | -58.05 | 180 | TG*G*T |
| 2.3  | HDA-1  | 173.05  | 161.79  | 61.74  | 180 | TTG*T  |
|      | HDA-2  | -172.36 | 172.96  | 168.96 | 180 | TTTT   |
|      | HDA-3  | 161.79  | -173.32 | -57.09 | 180 | TTG-T  |
|      | HDA-4  | 160.74  | -68.64  | -41.74 | 180 | TG*G*T |
| 2.55 | HDA-1  | 172.15  | 170.78  | 62.94  | 180 | TTG*T  |
|      | HDA-2  | -165.74 | -177.79 | 157.96 | 180 | TTTT   |
|      | HDA-3  | 165.07  | -175.89 | -57.18 | 180 | TTG-T  |
|      | HDA-4  | 173.04  | -55.74  | -46.68 | 180 | TG*G*T |
| 2.8  | HDA-1  | 176.41  | 178.95  | 63.61  | 180 | TTG*T  |
|      | HDA-2  | -156.99 | -171.79 | 151.05 | 180 | TTTT   |
|      | HDA-3  | 165.29  | -178.13 | -57.43 | 180 | TTG-T  |
|      | HDA-4  | 178.73  | -64.68  | -29.74 | 180 | TG*G*T |
| 3.3  | HDA-1  | 174.8   | 171.13  | 63.14  | 180 | TTG*T  |

|     |       |         |         |         |     |                                  |
|-----|-------|---------|---------|---------|-----|----------------------------------|
|     | HDA-2 | -147.02 | -179.73 | -166.69 | 180 | TTTT                             |
|     | HDA-3 | 167.9   | -177.37 | -65.45  | 180 | TTG <sup>+</sup> T               |
|     | HDA-4 | 168.32  | -39.68  | -54.54  | 180 | TG <sup>+</sup> G <sup>+</sup> T |
| 3.7 | HDA-1 | 179.84  | -178.01 | 60.61   | 180 | TTG <sup>+</sup> T               |
|     | HDA-2 | -150.83 | -171.8  | -172.57 | 180 | TTTT                             |
|     | HDA-3 | 174.44  | -172.09 | -74.73  | 180 | TTG <sup>+</sup> T               |
|     | HDA-4 | 167.29  | -50.6   | -40.9   | 180 | TG <sup>+</sup> G <sup>+</sup> T |

**Table S6.** Torsion angles of HDA linkers in Cd(HDA)<sub>2</sub>(NO<sub>3</sub>)<sub>2</sub> structures under temperature. Inv indicate C<sub>i</sub> symmetric HDA linkers.

| Temperature (K)   | HDA    | τ0 (°)  | τ1 (°)  | τ2 (°)  | τ3 (°)  | τ4 (°) | τ5 (°)  | τ6 (°) | Conformation code                   |
|-------------------|--------|---------|---------|---------|---------|--------|---------|--------|-------------------------------------|
| 298               | Site A | 171.43  | 152.67  | 62.63   | 180     | inv    | inv     | inv    | TTG <sup>+</sup> T                  |
|                   | Site B | 171.43  | -169.05 | -68.01  | 180     | inv    | inv     | inv    | TTGT                                |
| 250               | Site A | 170.42  | 151.56  | 62.69   | 180     | inv    | inv     | inv    | TTG <sup>+</sup> T                  |
|                   | Site B | 170.42  | -169.84 | -66.99  | 180     | inv    | inv     | inv    | TTGT                                |
| 200               | Site A | 171.43  | 152.67  | 62.63   | 180     | inv    | inv     | inv    | TTG <sup>+</sup> T                  |
|                   | Site B | 171.43  | -169.05 | -68.01  | 180     | inv    | inv     | inv    | TTGT                                |
| 150               | HDA-1  | -173.07 | 172.07  | 60.03   | -178.07 | -63.08 | -173.46 | 173.73 | TTG <sup>+</sup> TG <sup>+</sup> TT |
|                   | HDA-2  | -176.74 | -177.38 | -64.87  | 180     | inv    | inv     | inv    | TTGT                                |
|                   | HDA-3  | 166.08  | -178.07 | -65.46  | 180     | inv    | inv     | inv    | TTGT                                |
|                   | HDA-4  | 171.65  | 175.42  | 53.79   | 180     | inv    | inv     | inv    | TTG <sup>+</sup> T                  |
|                   | HDA-5  | -176.54 | 177.2   | -169.21 | 180     | inv    | inv     | inv    | TTTT                                |
|                   | HDA-6  | -178.43 | -71.04  | -176.36 | 180     | inv    | inv     | inv    | TG <sup>+</sup> TT                  |
|                   | HDA-7  | 162.17  | -66.75  | 178.75  | 180     | inv    | inv     | inv    | TG <sup>+</sup> TT                  |
| 100               | HDA-1  | -173.82 | 171.69  | 61.42   | -177.8  | -64.03 | -173.25 | 173.5  | TTG <sup>+</sup> TG <sup>+</sup> TT |
|                   | HDA-2  | -176.88 | -178.77 | -63.19  | 180     | inv    | inv     | inv    | TTGT                                |
|                   | HDA-3  | 165.62  | -177.88 | -65.69  | 180     | inv    | inv     | inv    | TTGT                                |
|                   | HDA-4  | 170.81  | 175.26  | 55.88   | 180     | inv    | inv     | inv    | TTG <sup>+</sup> T                  |
|                   | HDA-5  | -177.61 | 177.03  | -168.96 | 180     | inv    | inv     | inv    | TTTT                                |
|                   | HDA-6  | -177.87 | -71.00  | -176.73 | 180     | inv    | inv     | inv    | TG <sup>+</sup> TT                  |
|                   | HDA-7  | 161.91  | -67.74  | 178.95  | 180     | inv    | inv     | inv    | TG <sup>+</sup> TT                  |
| 100 -fast cooling | Site A | 172.4   | 151.63  | 62.4    | 180     | inv    | inv     | inv    | TTG <sup>+</sup> T                  |
|                   | Site B | 172.4   | -168.94 | -71.22  | 180     | inv    | inv     | inv    | TTGT                                |

**Table S7.** Torsion angles of HDA linkers in Cd<sub>2</sub>(HDA)<sub>3</sub>(NO<sub>3</sub>)<sub>4</sub> structures under pressure. Inv indicate C<sub>i</sub> symmetric HDA linkers.

| Pressure (GPa) | HDA   | τ0 (°)  | τ1 (°)  | τ2 (°)  | τ3 (°) | τ4 (°) | τ5 (°)  | τ6 (°) | Conformation code                                |
|----------------|-------|---------|---------|---------|--------|--------|---------|--------|--------------------------------------------------|
| 0.0001         | HDA-1 | -174.43 | 58.12   | 175.63  | -74.64 | 176.29 | -172.84 | 68.71  | TG <sup>+</sup> TG <sup>+</sup> TTG <sup>+</sup> |
|                | HDA-2 | 178.98  | -176.24 | -177.35 | 180    | inv    | inv     | inv    | TTTT                                             |
| 0.4            | HDA-1 | -172.33 | 56.4    | 176.67  | -76.67 | 175.32 | -170.61 | 70.42  | TG <sup>+</sup> TG <sup>+</sup> TTG <sup>+</sup> |
|                | HDA-2 | 178.53  | -174.96 | -177.41 | 180    | inv    | inv     | inv    | TTTT                                             |
| 1.2            | HDA-1 | -169.6  | 55.12   | 175.78  | -76.5  | 176.48 | -169.82 | 70.33  | TG <sup>+</sup> TG <sup>+</sup> TTG <sup>+</sup> |

|     |       |         |         |         |         |         |         |         |            |
|-----|-------|---------|---------|---------|---------|---------|---------|---------|------------|
|     | HDA-2 | 177.55  | -172.05 | -177.63 | 180     | inv     | inv     | inv     | TTTT       |
| 2.1 | HDA-1 | -168.57 | 54.3    | 174.86  | -75.86  | 176.14  | -171.51 | 74.69   | TG*TG*TTG* |
|     | HDA-2 | 172.97  | -162.28 | -175.6  | -176.88 | 179.4   | 177.71  | -178.13 | TTTTTTT    |
|     | HDA-3 | 164.79  | -51.39  | -176.5  | 75.39   | -176.65 | 169.96  | -69.88  | TG*TG*TTG* |
| 3.1 | HDA-1 | -164.75 | 42.21   | 179.64  | -65.83  | 175.77  | -176.64 | 75.29   | TG*TG*TTG* |
|     | HDA-2 | 174.31  | -150.95 | -173.45 | -175.71 | -178.91 | -179.57 | 178.85  | TTTTTTT    |
|     | HDA-3 | 159.1   | -56.09  | -179.09 | 79.66   | -176.15 | 173.53  | -74.13  | TG*TG*TTG* |
| 4.3 | HDA-1 | -171.21 | 49.14   | 174.69  | -75.15  | 171.21  | -177.09 | 76.55   | TG*TG*TTG* |
|     | HDA-2 | 177.25  | -124.48 | -169.88 | 169.36  | -175.72 | 171.13  | 172.2   | TTTTTTT    |
|     | HDA-3 | 176.05  | -44.28  | -160.91 | 80.71   | 169.59  | 148.25  | -52.85  | TG*TG*TTG* |

**Table S8.** Torsion angles of HDA linkers in  $\text{Cu}(\text{HDA})_2(\text{MeCN})_2 \cdot 2\text{BF}_4$  structures under pressure.

| Pressure (GPa)/Temperature (K) | HDA   | $\tau_0$ (°) | $\tau_1$ (°) | $\tau_2$ (°) | $\tau_3$ (°) | Conformation code |
|--------------------------------|-------|--------------|--------------|--------------|--------------|-------------------|
| 0.0001 / 298                   | HDA-1 | 165.22       | 177.25       | 176.91       | 180          | TTTT              |
| 0.15 / 298                     | HDA-1 | 162.84       | 178.88       | 178.19       | 180          | TTTT              |
| 0.4 / 298                      | HDA-1 | 161.25       | 177.58       | -178.18      | 180          | TTTT              |
| 0.7 / 298                      | HDA-1 | 165.14       | 174.17       | 166.76       | 180          | TTTT              |
| 1.0 / 298                      | HDA-1 | 167.46       | -179.08      | 173.6        | 180          | TTTT              |
| 0.0001 / 100                   | HDA-1 | 163.98       | -177.45      | -176.02      | 180          | TTTT              |
